# Supplementary material for: Characterizing Wind Gusts in Complex Terrain
Source: Copernicus journal article supplement (doi:10.5194/acp-2018-906), 2018-09-20
Supplement: Supplementary file 1 [file acp-2018-906-supplement.pdf]

# Characterizing Wind Gusts in Complex Terrain.

## Supplementary Information

Frederick Letson<sup>1,2</sup>, Rebecca J. Barthelmie<sup>2</sup>, Weifei Hu<sup>1,2</sup>, Sara C. Pryor<sup>1</sup>

5 <sup>1</sup>Department of Earth and Atmospheric Sciences, Cornell University, Ithaca, New York

<sup>2</sup>Sibley School of Mechanical and Aerospace Engineering, Cornell University, Ithaca, New York

*Correspondence to:* Frederick Letson ([fl368@cornell.edu](mailto:fl368@cornell.edu)) and Sara C. Pryor ([sp2279@cornell.edu](mailto:sp2279@cornell.edu))

10 As described in the main text, (Section 3.1) best fit distribution types are chosen based on minimum negative-log-likelihood (NLL), though the minimum NLL is frequently similar to the next-best choice. In order to expand on the information given in Table 2 of the main text, Table S1 shows the best and second-best fit distribution types and their associated NLL values.

15 Figures S1 to S5 show joint distributions of pairs of gust parameters which have been transformed to be normally distributed as described in Section 3.1. These parameters joint probability distributions describe the correlation of gusts parameters between towers and between measurements heights at Tower 29.

**Table S1 – Best and second-best fit distribution types for each gust properties (in each 10 minute period when  $U_{\text{mean}} > 3\text{ms}^{-1}$ ) for a measurement height of 60 m a.g.l. at each tower. The distribution types are referred to as 1-4 where 1: Weibull, 2: log-logistic, 3: log-normal, 4: gamma. Negative-log-likelihood values for each distribution type (best and second-best) are also shown.**

|                               |                    | Tower |       |        |       |       |       |        |        |       |
|-------------------------------|--------------------|-------|-------|--------|-------|-------|-------|--------|--------|-------|
|                               |                    | 7     | 10    | 20     | 22    | 25    | 27    | 29     | 34     | 37    |
| Best fit distributions        | $U_{\text{mean}}$  | 3     | 3     | 3      | 3     | 3     | 3     | 3      | 3      | 3     |
|                               | $U_{\text{gust}}$  | 3     | 3     | 3      | 3     | 3     | 3     | 3      | 3      | 3     |
|                               | GF                 | 2     | 3     | 2      | 3     | 3     | 3     | 3      | 2      | 2     |
|                               | $a_{\text{gust}}$  | 1     | 1     | 1      | 1     | 4     | 1     | 1      | 1      | 1     |
|                               | $k_{\text{peak}}$  | 2     | 2     | 2      | 2     | 3     | 2     | 2      | 2      | 2     |
|                               | $t_{\text{rise}}$  | 3     | 3     | 3      | 3     | 3     | 3     | 3      | 3      | 3     |
|                               | $t_{\text{lapse}}$ | 3     | 3     | 3      | 3     | 3     | 3     | 3      | 3      | 3     |
|                               | $t_{\text{gust}}$  | 3     | 3     | 3      | 3     | 3     | 3     | 3      | 3      | 4     |
|                               | $L_{\text{gust}}$  | 3     | 3     | 4      | 3     | 3     | 3     | 4      | 4      | 4     |
| Best fit NLL                  | $U_{\text{mean}}$  | 3447  | 10129 | 15010  | 5572  | 3527  | 4332  | 13835  | 14954  | 14879 |
|                               | $U_{\text{gust}}$  | 4711  | 12790 | 16767  | 7188  | 4714  | 5962  | 15716  | 16858  | 16558 |
|                               | GF                 | 201   | 771   | -1691  | 532   | 475   | 686   | -1352  | -1735  | -1878 |
|                               | $a_{\text{gust}}$  | 3792  | 9677  | 10027  | 5569  | 3695  | 4801  | 9733   | 10257  | 9756  |
|                               | $k_{\text{peak}}$  | 4303  | 6889  | -16140 | 4374  | 1097  | 4077  | -10870 | -16874 | 10026 |
|                               | $t_{\text{rise}}$  | 7786  | 19802 | 23128  | 12302 | 7983  | 9904  | 22580  | 23292  | 22608 |
|                               | $t_{\text{lapse}}$ | 9000  | 23589 | 28551  | 14216 | 9183  | 11552 | 28329  | 28945  | 28292 |
|                               | $t_{\text{gust}}$  | 9001  | 23098 | 26872  | 14238 | 9174  | 11495 | 26347  | 27216  | 26318 |
|                               | $L_{\text{gust}}$  | 13543 | 35204 | 42949  | 21266 | 13845 | 17136 | 42128  | 43278  | 42450 |
| Second-best fit distributions | $U_{\text{mean}}$  | 4     | 4     | 4      | 2     | 4     | 4     | 2      | 4      | 4     |
|                               | $U_{\text{gust}}$  | 4     | 4     | 4      | 2     | 4     | 4     | 4      | 4      | 4     |
|                               | GF                 | 3     | 2     | 3      | 2     | 4     | 2     | 2      | 3      | 3     |
|                               | $a_{\text{gust}}$  | 2     | 4     | 4      | 4     | 2     | 4     | 4      | 4      | 4     |
|                               | $k_{\text{peak}}$  | 3     | 3     | 3      | 3     | 4     | 3     | 3      | 3      | 3     |
|                               | $t_{\text{rise}}$  | 2     | 2     | 2      | 2     | 2     | 2     | 2      | 2      | 2     |
|                               | $t_{\text{lapse}}$ | 2     | 2     | 2      | 2     | 2     | 4     | 4      | 2      | 2     |
|                               | $t_{\text{gust}}$  | 4     | 2     | 4      | 2     | 4     | 4     | 4      | 4      | 3     |
|                               | $L_{\text{gust}}$  | 4     | 4     | 3      | 2     | 4     | 4     | 3      | 3      | 3     |
| Second-best fit NLL           | $U_{\text{mean}}$  | 3497  | 10246 | 15159  | 5588  | 3577  | 4403  | 14000  | 15084  | 15037 |
|                               | $U_{\text{gust}}$  | 4737  | 12865 | 16860  | 7226  | 4727  | 5967  | 15836  | 16953  | 16654 |
|                               | GF                 | 227   | 862   | -1599  | 538   | 501   | 712   | -1325  | -1686  | -1817 |
|                               | $a_{\text{gust}}$  | 3888  | 9730  | 10076  | 5656  | 3716  | 4913  | 9807   | 10303  | 9898  |
|                               | $k_{\text{peak}}$  | 7103  | 14773 | 16307  | 9151  | 1109  | 7907  | 15713  | 17693  | 19044 |
|                               | $t_{\text{rise}}$  | 7820  | 19900 | 23234  | 12364 | 8019  | 9948  | 22679  | 23402  | 22719 |
|                               | $t_{\text{lapse}}$ | 9029  | 23682 | 28662  | 14277 | 9222  | 11597 | 28438  | 29051  | 28397 |
|                               | $t_{\text{gust}}$  | 9009  | 23172 | 26907  | 14283 | 9189  | 11517 | 26364  | 27271  | 26320 |
|                               | $L_{\text{gust}}$  | 13550 | 35251 | 42975  | 21312 | 13865 | 17139 | 42175  | 43307  | 42499 |

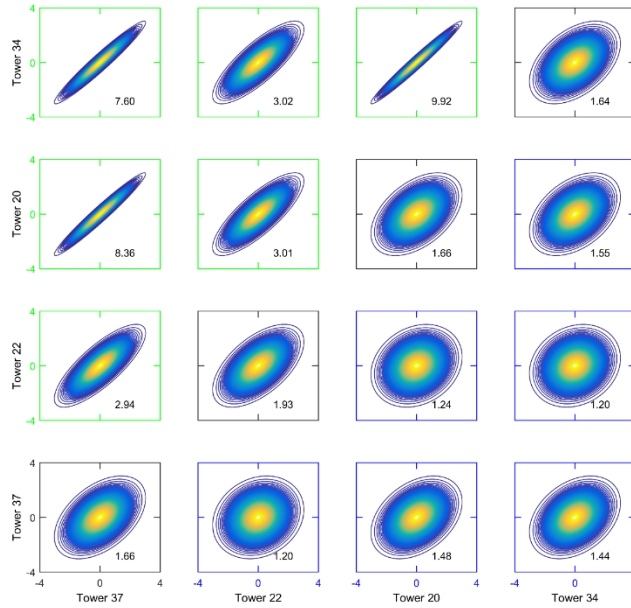

5 **Figure S1 – Joint distributions of gust magnitude ( $U_{gust}$ ) at different towers and joint distribution of gust length scale ( $L_{gust}$ ) at different towers. Wind data from Towers 20, 22, 34, and 37 at 60 m (See Figure 1 and Table 1 in the main text for locations). Upper-left off-diagonal panels (green boxes):  $U_{gust}$  vs.  $U_{gust}$  at each pair of towers; Diagonal panels (black boxes):  $U_{gust}$  vs.  $L_{gust}$  at the same tower; Bottom-right off-diagonal panels (blue boxes):  $L_{gust}$  vs.  $L_{gust}$  at each pair of towers. There are 99 ellipses corresponding to the confidence levels from 1% (the innermost ellipse with the warmest color) to 99% (the outermost with the coldest color).**

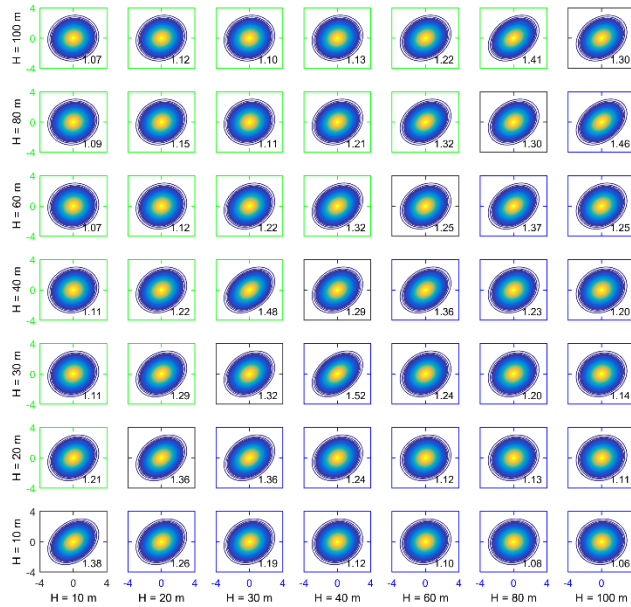

10 **Figure S2 – Joint distributions of gust lapse time ( $t_{lapse}$ ) and gust rise time ( $t_{rise}$ ) at different heights from Tower 29. Upper-left off-diagonal panels with green boxes show the joint distributions of  $t_{lapse}$  at each pair of heights. Diagonal panels with black boxes show the joint distributions of  $t_{lapse}$  and  $t_{rise}$  at the same height. Bottom-right off-diagonal panels with blue boxes show the joint distributions of  $t_{rise}$  at each pair of heights. The number at the bottom-right corner of each panel is the average ratio between the major axis and minor axis of ellipses. There are 99 ellipses corresponding to the confidence levels from 1% (the most inner ellipse with the warmest color) to**  
 15 **99% (the most outer ellipse with the coldest color).**

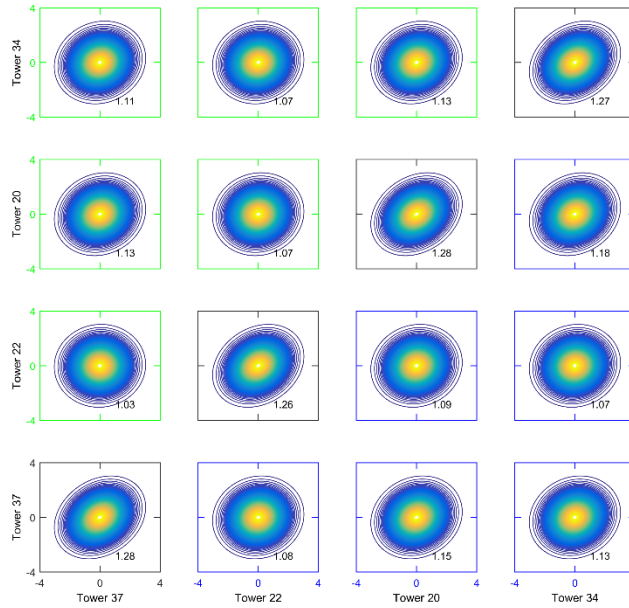

5 **Figure S3 – Joint distributions of lapse time ( $t_{\text{lapse}}$ ) at different towers and joint distribution of gust rise time ( $t_{\text{rise}}$ ) at different towers. Wind data are from Towers 20, 22, 34, and 37 at 60 m (See Figure 1 and Table 1 in the main text for locations). Upper-left off-diagonal panels (green boxes):  $t_{\text{lapse}}$  vs.  $t_{\text{lapse}}$  at each pair of towers; Diagonal panels (black boxes):  $t_{\text{lapse}}$  vs.  $t_{\text{rise}}$  at the same tower; Bottom-right off-diagonal panels (blue boxes):  $t_{\text{rise}}$  vs.  $t_{\text{rise}}$  at each pair of towers. Wind data are from Towers 20, 22, 34, and 37 at 60 m (See Figure 1 and Table 1 in the main text for locations). There are 99 ellipses corresponding to the confidence levels from 1% (the innermost ellipse with the warmest color) to 99% (the outermost with the coldest color).**

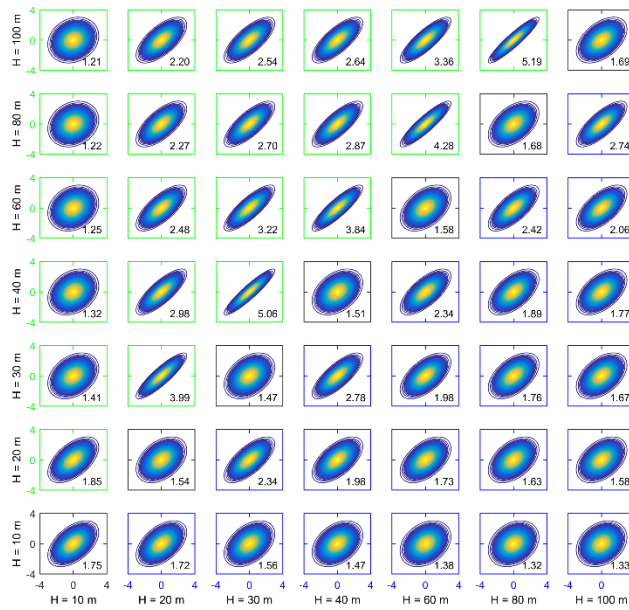

10 **Figure S4 – Joint distributions of gust peak factor ( $k_{\text{peak}}$ ) and gust factor (GF) at different heights from Tower 29. Upper-left off-diagonal panels with green boxes show the joint distributions of  $k_{\text{peak}}$  at each pair of heights. Diagonal panels with black boxes show the joint distributions of  $k_{\text{peak}}$  and GF at the same height. Bottom-right off-diagonal panels with blue boxes show the joint distributions of GF at each pair of heights. The number at the bottom-right corner of each panel is the average ratio between the major axis and minor axis of ellipses. There are 99 ellipses corresponding to the confidence levels from 1% (the most inner ellipse with the warmest color) to 99% (the most outer ellipse with the coldest color).**

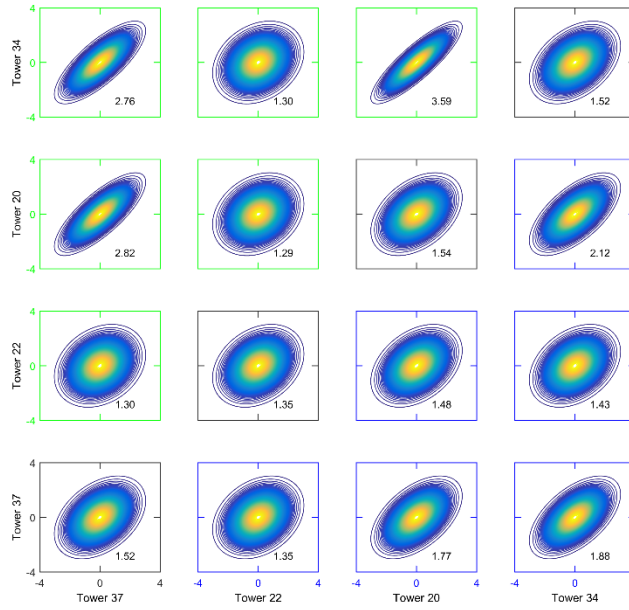

5 **Figure S5 – Joint distributions of gust peak factor ( $k_{\text{peak}}$ ) at different towers and joint distribution of gust factor (GF) at different towers. Wind data from Towers 20, 22, 34, and 37 at 60 m (See Figure 1 and Table 1 in the main text for locations). Upper-left off-diagonal panels (green boxes):  $k_{\text{peak}}$  vs.  $k_{\text{peak}}$  at each pair of towers; Diagonal panels (black boxes):  $k_{\text{peak}}$  vs. GF at the same tower; Bottom-right off-diagonal panels (blue boxes): GF vs. GF at each pair of towers. There are 99 ellipses corresponding to the confidence levels from 1% (the innermost ellipse with the warmest color) to 99% (the outermost with the coldest color).**
